# Supplementary material
Source: publisher figshare collection journal article supplement (https://acs.figshare.com/ndownloader/files/4422460)
Supplement: Supplementary file 1 [file 4422460]

## **SUPPORTING INFORMATION**

### **Surfactant-free RAFT emulsion polymerization using poly(*N,N*-dimethyl acrylamide) trithiocarbonate macromolecular chain transfer agents.**

*Jutta Rieger<sup>1\*</sup>, Wenjing Zhang<sup>1</sup>, François Stoffelbach<sup>1</sup>, Bernadette Charleux<sup>2\*</sup>*

1 UPMC Univ. Paris 6 and CNRS, Laboratoire de Chimie des Polymères, UMR 7610, 4 place Jussieu, Tour 44-54, 75252 Paris Cedex 05, France  
jutta.rieger@upmc.fr

2 Université de Lyon, Univ. Lyon 1, CPE Lyon, CNRS UMR 5265, C2P2, Team LCPP Bat 308F, 43 Bd du 11 novembre 1918, 69616 Villeurbanne, France  
bernadette.charleux@lcpp.cpe.fr

# **A- NMR characterization of the RAFT agents TTCA-12, TTCA-4 and ATTCA**

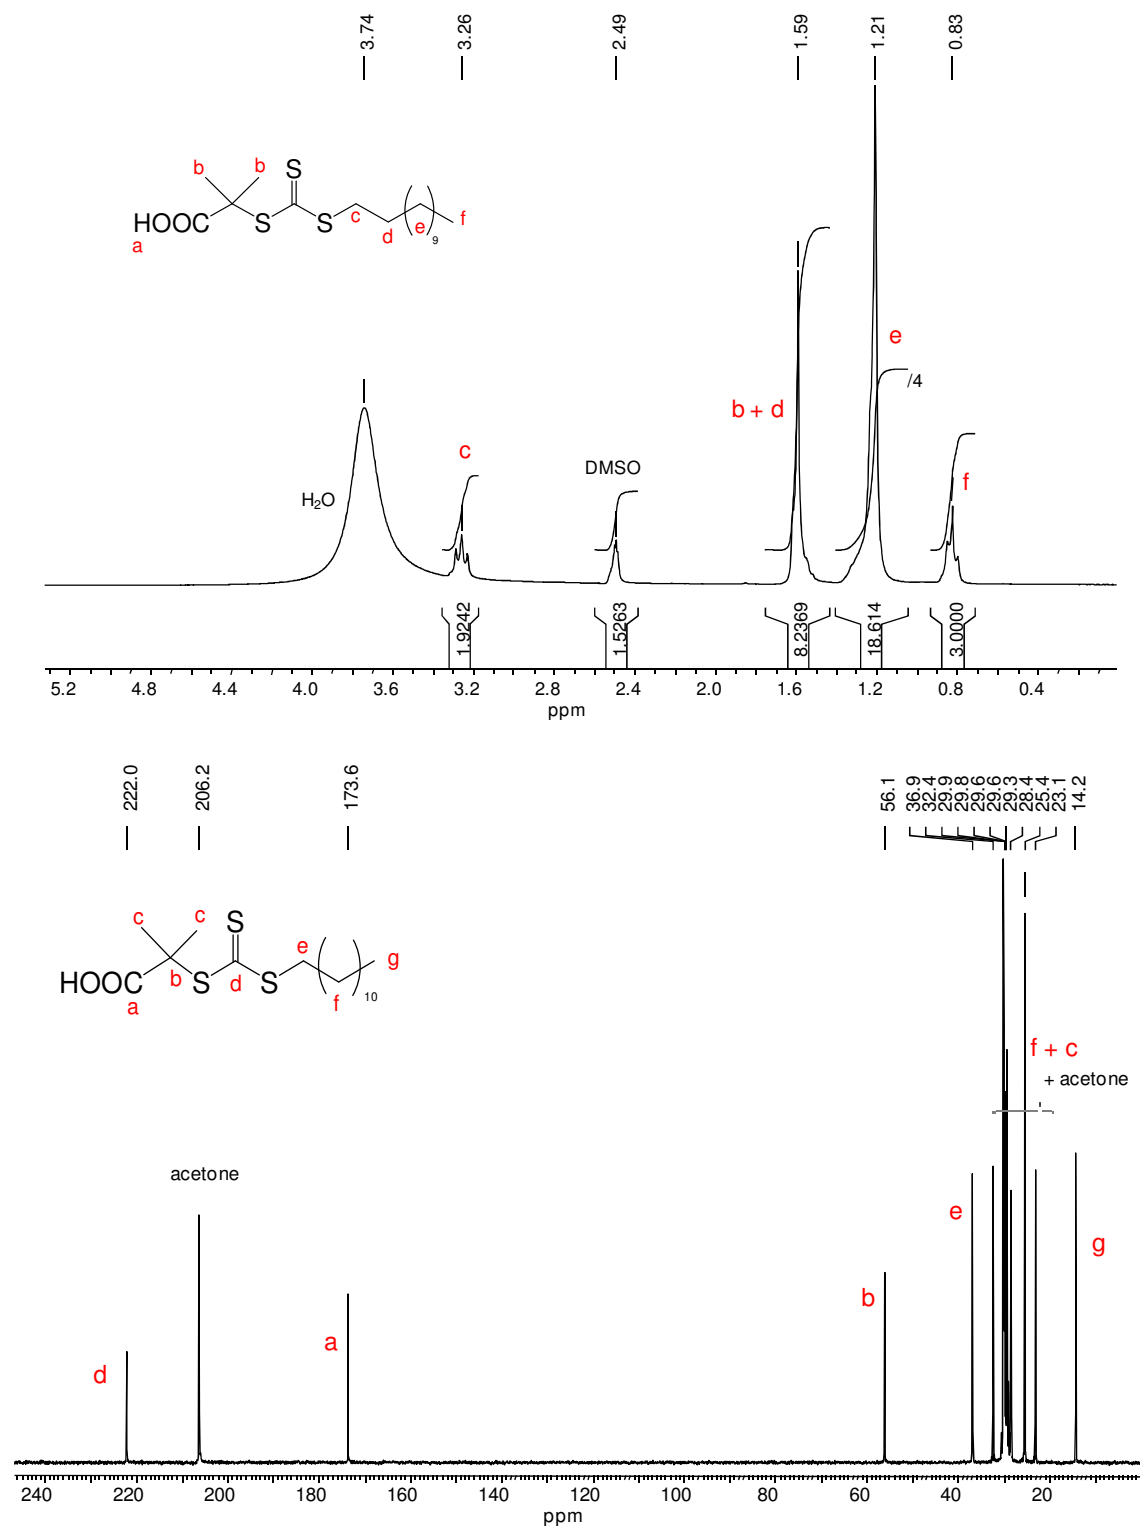

**Figure SI-1.** 250 MHz <sup>1</sup>H NMR spectrum of TTCA-12 in DMSO-d<sub>6</sub> and 63 MHz <sup>13</sup>C NMR spectrum in acetone-d<sub>6</sub>.

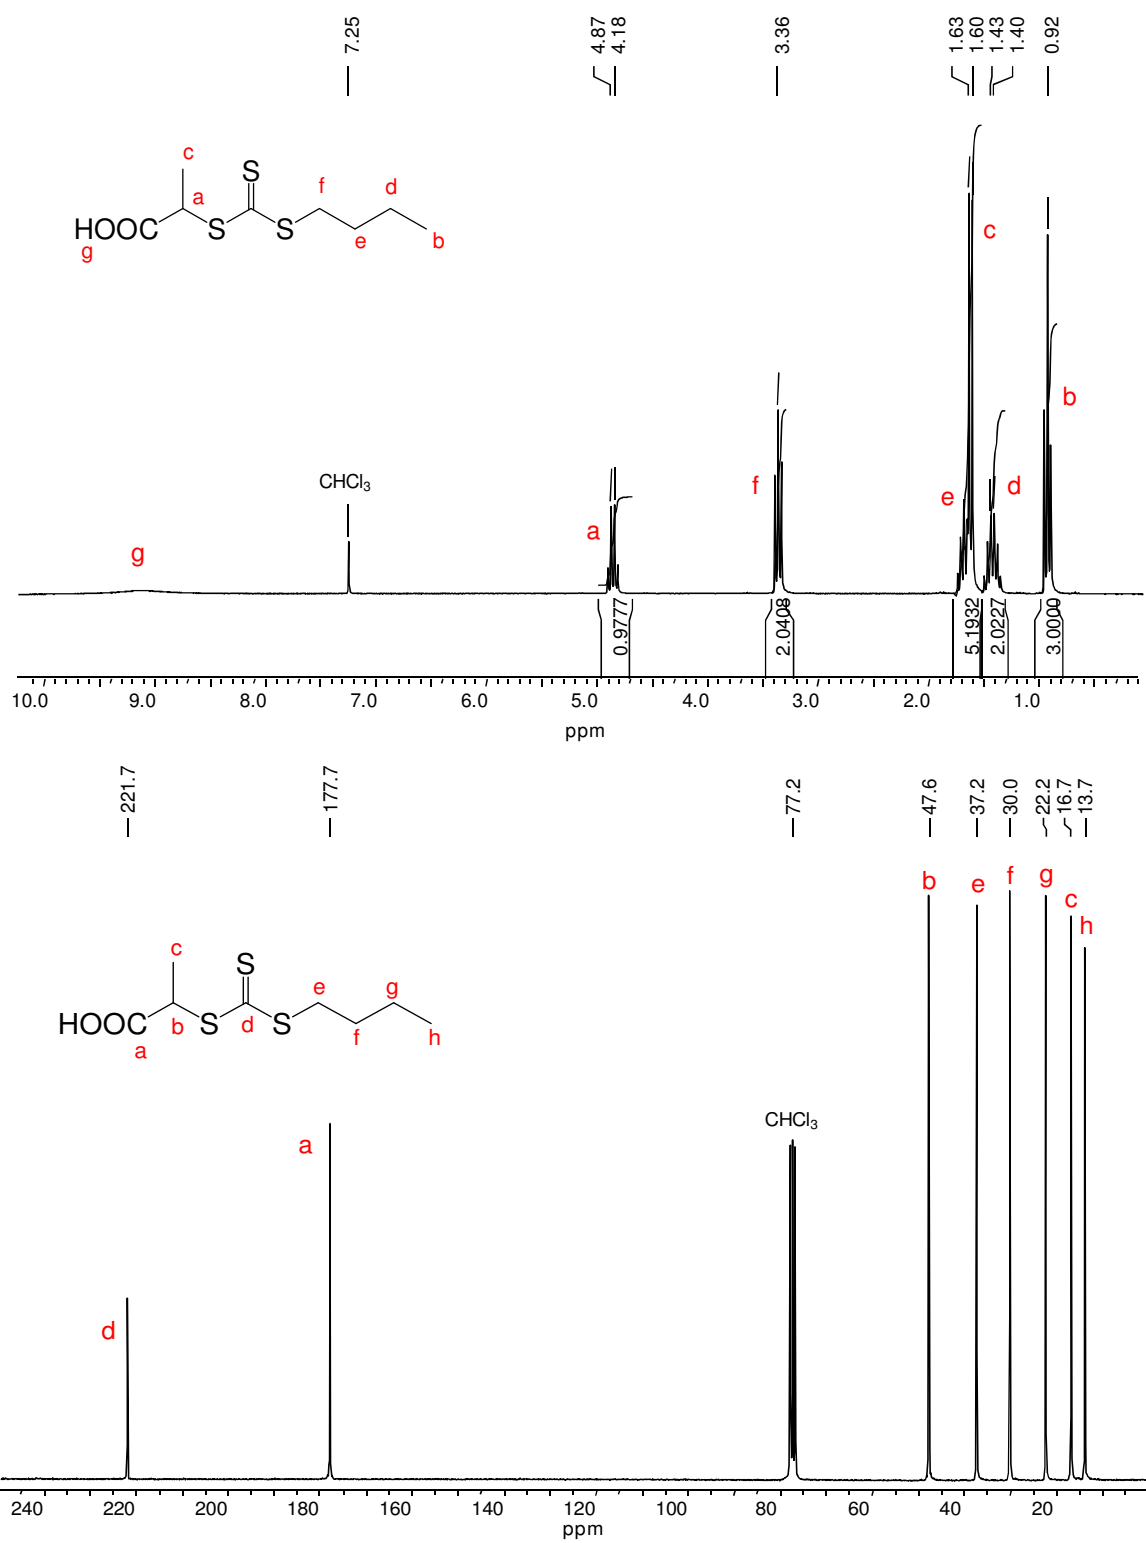

**Figure SI-2.** 250 MHz <sup>1</sup>H NMR and 63 MHz <sup>13</sup>C NMR spectra of TTCA-4 in CDCl<sub>3</sub>.



## **B- SEC characterization of the PDMAAm macroRAFT agents**

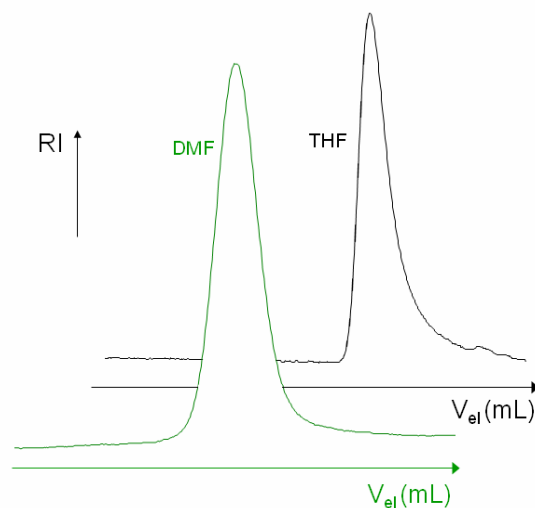

**Figure SI-4.** SEC chromatograms for the PDMAAm macroRAFT agent **B3** in THF and in DMF (see Table 1 in the article).

## **C- Solution polymerization of *n*-butyl acrylate and styrene in the presence of the PDMAAm macroRAFT agents and characterization of the formed diblock copolymers**

### **Solution polymerization of *n*-butyl acrylate (*n*BA)**

For the synthesis of PDMAAm-*Pn*BA block copolymers, polymerizations of *n*BA were performed in 1,4-dioxane at 70°C with ACPA as an initiator, in the presence of the different macromolecular RAFT agents (see Table SI-1 for detailed polymerization conditions). In a typical experiment (Table SI-1, entry **A2-S1**), the polymerization of 1.5 g *n*BA (4.0 mol.L<sup>-1</sup>) was carried out with 126 mg PDMAAm-TTC-12, **A2**, ( $M_n = 7300$  g.mol<sup>-1</sup>;  $5.8 \times 10^{-3}$  mol.L<sup>-1</sup>) in 1.3 mL of 1,4-dioxane with 1.1 mg ACPA (0.5 mL of a stock solution at 2.2 g.L<sup>-1</sup>). The solution was placed in a septum-sealed flask, purged for 30 min with nitrogen in an ice bath and heated to 70°C in a thermostated oil bath under stirring. Sampling was performed at regular time intervals, and the polymerization was stopped by immersion of the flask in iced water. The monomer conversion was determined by gravimetry.

### **Solution polymerization of styrene (S)**

For the synthesis of PDMAAm-PS block copolymers, polymerizations of S were performed in 1,4-dioxane at 80°C with ACPA as an initiator, in the presence of the different macromolecular RAFT agents (see Table SI-2 for detailed polymerization conditions). In a typical experiment (Table SI-2, entry **A3-SS1**), the polymerization of 1.51 g S (2.0 mol.L<sup>-1</sup>) was carried out with 211 mg PDMAAm-TTC-12, **A3**, ( $M_n = 10700$  g.mol<sup>-1</sup>;  $2.7 \times 10^{-3}$  mol.L<sup>-1</sup>) in 5.6 mL of 1,4-dioxane with 1.3 mg ACPA (0.5 mL of a stock solution at 2.6 g.L<sup>-1</sup>). The solution was placed in a septum-sealed flask, purged for 30 min with nitrogen in an ice bath and heated to 80°C in a thermostated oil bath under stirring. The monomer conversion was determined by gravimetry.

**Table SI-1.** Experimental conditions and results for the solution polymerizations of *n*BA in 1,4-dioxane at 70 °C in the presence of different PDMAAm-TTC macroRAFT agents.

| Entry                    | Macro-RAFT |                    | $[nBA]_0$<br>(mol.L <sup>-1</sup> ) | $[Macro-RAFT]_0$<br>(mmol.L <sup>-1</sup> ) | $[ACPA]_0$<br>(mmol.L <sup>-1</sup> ) | DP <sub>n,th</sub> <sup>b</sup><br><i>Pn</i> BA block | <i>t</i><br>(min) | conv.<br>(%) <sup>c</sup> | $M_{n,th}$ <sup>b</sup><br>(kg.mol <sup>-1</sup> ) | $M_{n,exp}$ <sup>d</sup><br>(kg.mol <sup>-1</sup> ) | $M_w/M_n$ <sup>d</sup> |
|--------------------------|------------|--------------------|-------------------------------------|---------------------------------------------|---------------------------------------|-------------------------------------------------------|-------------------|---------------------------|----------------------------------------------------|-----------------------------------------------------|------------------------|
|                          | #          | $M_n$ <sup>a</sup> |                                     |                                             |                                       |                                                       |                   |                           |                                                    |                                                     |                        |
| <b>A1-S1</b>             | <b>A1</b>  | 3.2                | 4.0                                 | 13                                          | 2.7                                   | 300                                                   | 30                | 42                        | 19.1                                               | 19.9                                                | 1.15                   |
|                          |            |                    |                                     |                                             |                                       |                                                       | 52                | 64                        | 27.7                                               | 26.3                                                | 1.14                   |
| <b>A2-S1</b>             | <b>A2</b>  | 7.3                | 4.0                                 | 5.8                                         | 1.4                                   | 690                                                   | 25                | 25                        | 35.4                                               | 42.5                                                | 1.27                   |
|                          |            |                    |                                     |                                             |                                       |                                                       | 90                | 35                        | 43.3                                               | 48.7                                                | 1.22                   |
| <b>A2-S2<sup>e</sup></b> | <b>A2</b>  | 7.3                | bulk                                | 8.9                                         | 0.9 <sup>d</sup>                      | 790                                                   | 160               | 70                        | 78.0                                               | 77.9                                                | 1.16                   |
| <b>B1-S1</b>             | <b>B1</b>  | 4.2                | 2.0                                 | 2.8                                         | 0.7                                   | 710                                                   | 100               | 43                        | 43.2                                               | 28.4                                                | 1.36                   |
|                          |            |                    |                                     |                                             |                                       |                                                       | 190               | 73                        | 70.3                                               | 38.5                                                | 1.46                   |
|                          |            |                    |                                     |                                             |                                       |                                                       | 270               | 87                        | 83.0                                               | 42.0                                                | 1.50                   |
| <b>B2-S1</b>             | <b>B2</b>  | 8.7                | 2.0                                 | 3.1                                         | 0.7                                   | 650                                                   | 40                | 33                        | 36.4                                               | 26.7                                                | 1.36                   |
|                          |            |                    |                                     |                                             |                                       |                                                       | 65                | 50                        | 50.6                                               | 32.2                                                | 1.42                   |
|                          |            |                    |                                     |                                             |                                       |                                                       | 240               | 90                        | 84.1                                               | 39.8                                                | 1.58                   |
| <b>B3-S1</b>             | <b>B3</b>  | 12.4               | 4.0                                 | 6.6                                         | 1.4                                   | 600                                                   | 43                | 66                        | 63.4                                               | 50.7                                                | 1.28                   |
| <b>C1-S1</b>             | <b>C1</b>  | 6.6                | 4.0                                 | 5.5                                         | 1.3                                   | 730                                                   | 48                | 37                        | 41.7                                               | 35.1                                                | 1.35                   |
|                          |            |                    |                                     |                                             |                                       |                                                       | 94                | 65                        | 67.6                                               | 52.6                                                | 1.27                   |
|                          |            |                    |                                     |                                             |                                       |                                                       | 150               | 79                        | 80.7                                               | 59.0                                                | 1.26                   |
| <b>C2-S1</b>             | <b>C2</b>  | 9.8                | 4.0                                 | 6.5                                         | 1.3                                   | 620                                                   | 31                | 19                        | 24.9                                               | 15.7                                                | 1.81                   |
|                          |            |                    |                                     |                                             |                                       |                                                       | 51                | 33                        | 35.9                                               | 23.8                                                | 1.56                   |
| <b>C2-S2</b>             | <b>C2</b>  | 9.8                | 2.0                                 | 3.8                                         | 0.8                                   | 520                                                   | 41                | 33                        | 31.9                                               | 22.3                                                | 1.75                   |
|                          |            |                    |                                     |                                             |                                       |                                                       | 69                | 52                        | 44.7                                               | 33.0                                                | 1.51                   |
|                          |            |                    |                                     |                                             |                                       |                                                       | 145               | 76                        | 60.8                                               | 36.7                                                | 1.52                   |
|                          |            |                    |                                     |                                             |                                       |                                                       | 258               | 91                        | 70.9                                               | 37.5                                                | 1.54                   |

<sup>a</sup>  $M_n$  determined by SEC in DMF by light scattering (LS) ( $dn/dc = 0.081 \text{ mL.g}^{-1}$ ); <sup>b</sup> theoretical number-average molar mass,  $M_{n,th}$ , and number-average degree of polymerization,  $DP_n$ , calculated using conversion<sup>c</sup>; <sup>c</sup> Monomer conversion determined by gravimetry; <sup>d</sup>  $M_n$  and  $M_w/M_n$  determined by SEC in THF with a PS calibration; <sup>e</sup> Experiment **A2-S2** was performed in bulk with 2,2'-azobis(isobutyronitrile) (AIBN) as initiator.

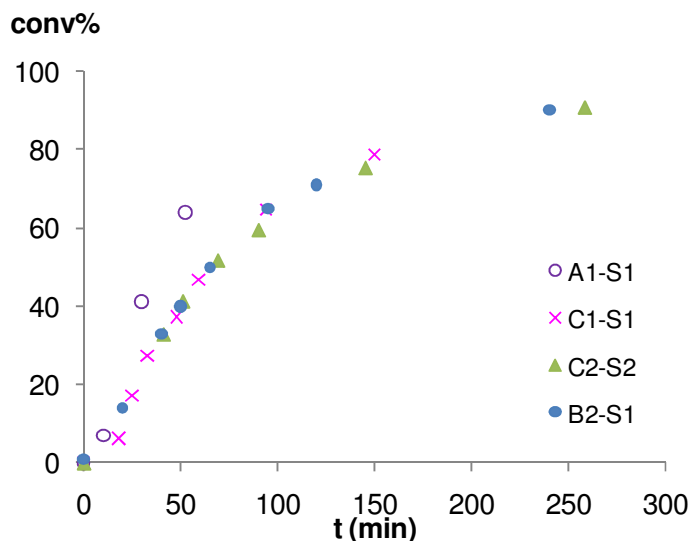

**Figure SI-5.** Evolution of the monomer conversion with time for the solution polymerization of *n*BA in the presence of different PDMAAm macroRAFT agents ( $[nBA]_0 = 2 \text{ mol.L}^{-1}$  (**B2-S1**, **C2-S2**) or  $4 \text{ mol.L}^{-1}$  (**A1-S1**, **C1-S1**),  $[ACPA]_0 = 0.7 \text{ mmol.L}^{-1}$  (**B2-S1**),  $0.8 \text{ mmol.L}^{-1}$  (**C2-S2**),  $1.3 \text{ mmol.L}^{-1}$  (**C1-S1**) or  $2.7 \text{ mmol.L}^{-1}$  (**A1-S1**\*). \*The higher initiator concentration being responsible for the faster kinetics.

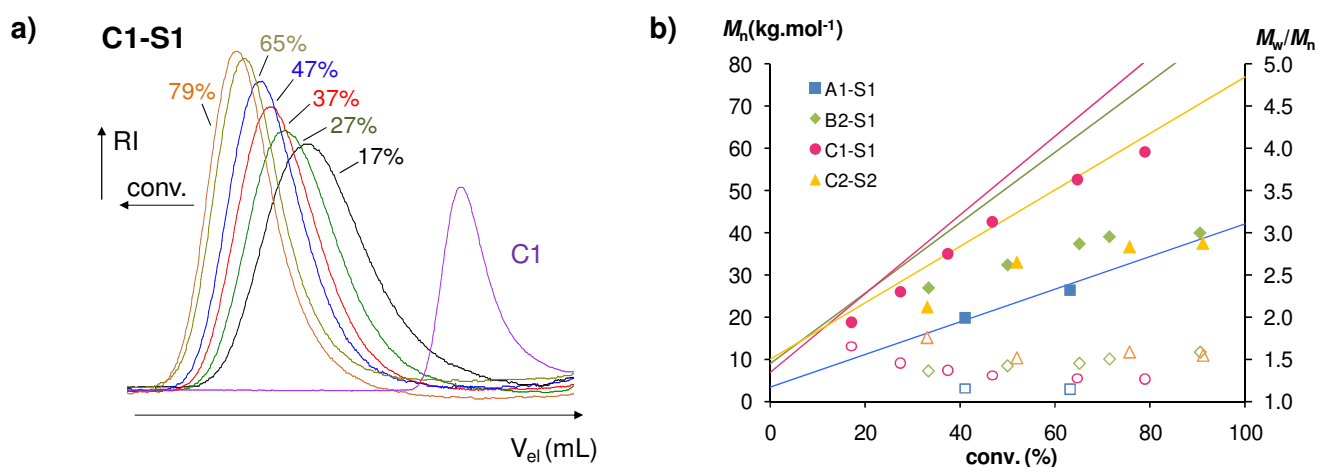

**Figure SI-6.** Solution polymerization of *n*BA in 1,4-dioxane in the presence of different PDMAAm macroRAFT agents (**A1**, **B2**, **C1** and **C2**): a) an example of the evolution of the size exclusion chromatograms with monomer conversion (Experiment **C1-S1**); b) evolution of the number average molar mass,  $M_n$ , (full symbols) and polydispersity index ( $M_w/M_n$ ) (open symbols) with time (determined by SEC in THF and calculated with a PS calibration curve). The straight lines correspond to the theoretical  $M_n$  vs. conversion.

**Table SI-2.** Experimental conditions and results for the solution polymerizations of styrene (S) in 1,4-dioxane at 80 °C in the presence of PDMAAm-TTC-12, **A1** and **A3**.<sup>a</sup>

| Entry         | MacroRAFT |                                           | DP <sub>n</sub> <sup>c</sup><br>(S) | [RAFT] <sub>0</sub><br>(mmol.L <sup>-1</sup> ) | [ACPA] <sub>0</sub><br>(mmol.L <sup>-1</sup> ) | t<br>(h) | conv. <sup>b</sup><br>(%) <sup>a</sup> | M <sub>n,th</sub> <sup>c</sup><br>(kg.mol <sup>-1</sup> ) | M <sub>n,exp</sub> <sup>d</sup><br>(kg.mol <sup>-1</sup> ) | M <sub>w</sub> /M <sub>n</sub> <sup>d</sup> |
|---------------|-----------|-------------------------------------------|-------------------------------------|------------------------------------------------|------------------------------------------------|----------|----------------------------------------|-----------------------------------------------------------|------------------------------------------------------------|---------------------------------------------|
|               | #         | M <sub>n</sub><br>(kg.mol <sup>-1</sup> ) |                                     |                                                |                                                |          |                                        |                                                           |                                                            |                                             |
| <b>A1-SS1</b> | A1        | 3.2                                       | 620                                 | 3.2                                            | 0.6                                            | 20       | 19                                     | 15.5                                                      | 12.4                                                       | 1.44                                        |
| <b>A3-SS1</b> | A3        | 10.7                                      | 736                                 | 2.7                                            | 0.6                                            | 20       | 20                                     | 25.6                                                      | 14.3                                                       | 1.46                                        |

<sup>a</sup> [S]<sub>0</sub> = 2 M; <sup>b</sup> Monomer conversion by gravimetry; <sup>c</sup> Theoretical number-average molar mass, M<sub>n,th</sub>, and number-average degree of polymerization, DP<sub>n</sub>, calculated using conversion<sup>b</sup>; <sup>d</sup> M<sub>n</sub> and M<sub>w</sub>/M<sub>n</sub> determined by SEC in THF with a PS calibration.

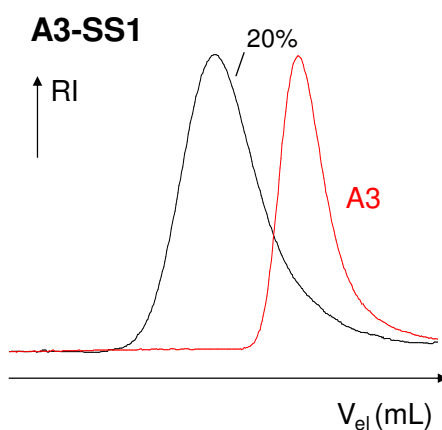

**Figure SI-7.** SEC chromatograms in THF for sample **A3-SS1** prepared by polymerization of styrene in 1,4-dioxane at 80 °C with macroRAFT agent **A3**.
